# Supplementary material for: A genome-wide association study using a Vietnamese landrace panel of rice (Oryza sativa) reveals new QTLs controlling panicle morphological traits
Source: PubMed Central journal article supplement (PMC6234598; doi:10.1186/s12870-018-1504-1), 2018-11-14

2014

PBN

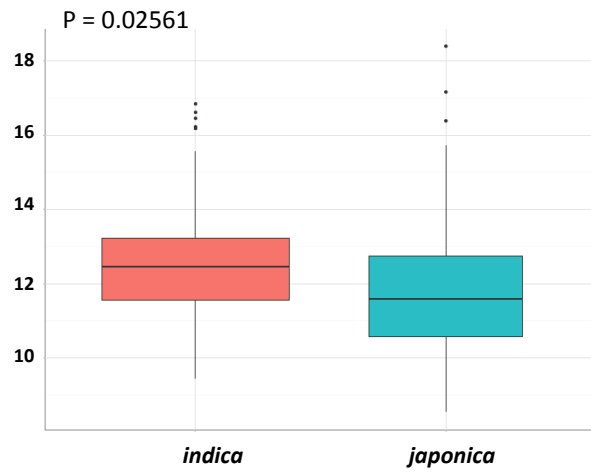

SBN

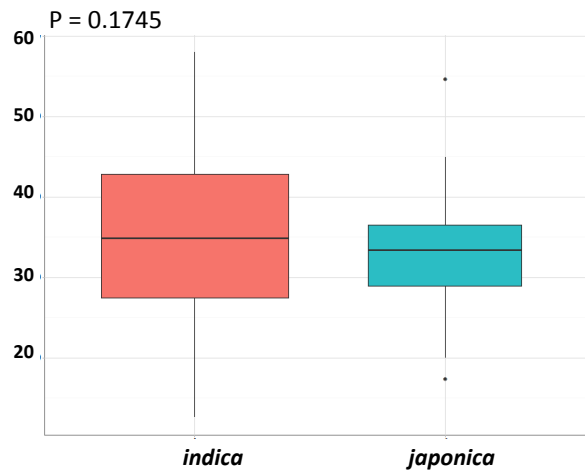

SpN

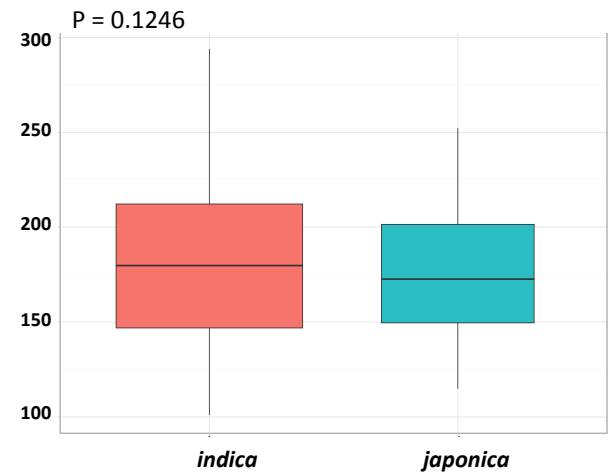

PBintl

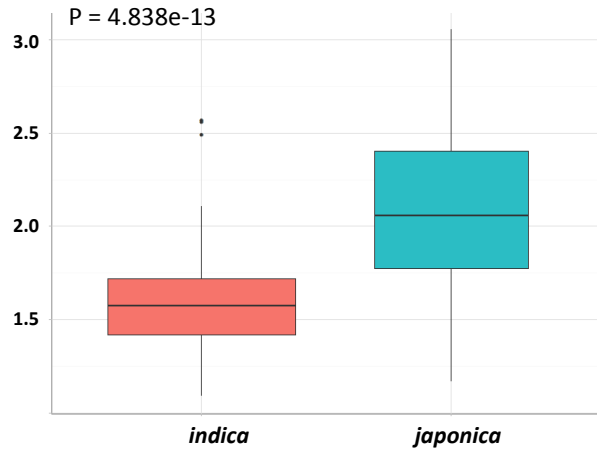

SBintl

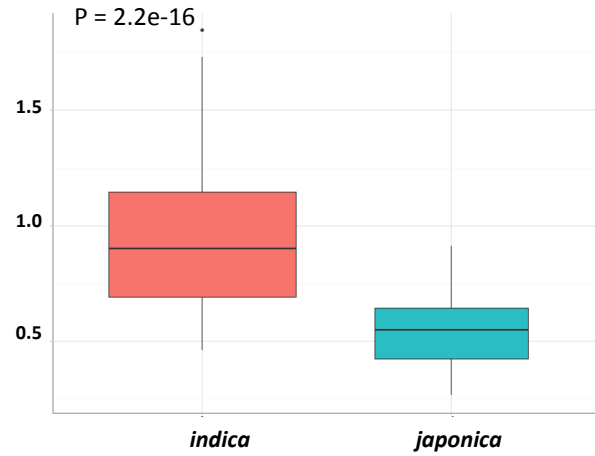

RL

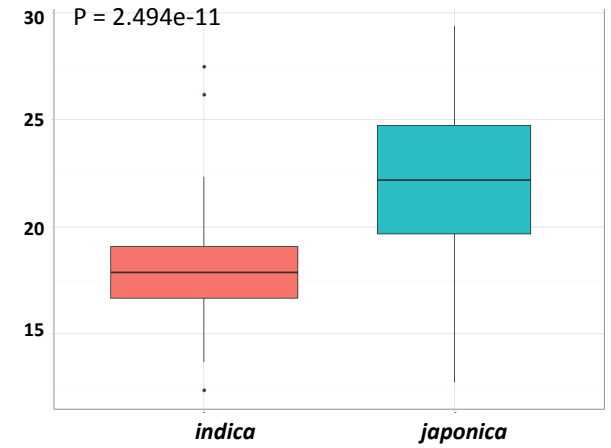

PBL

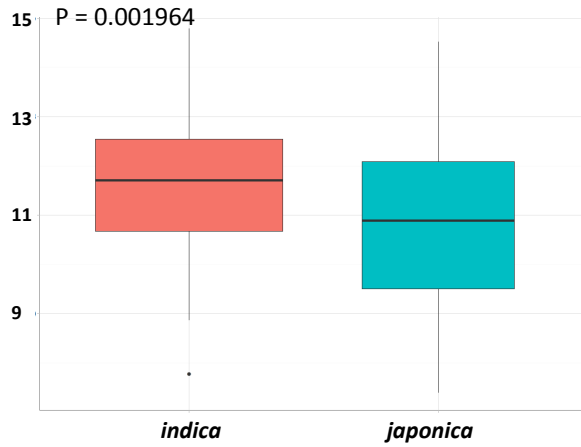

SBL

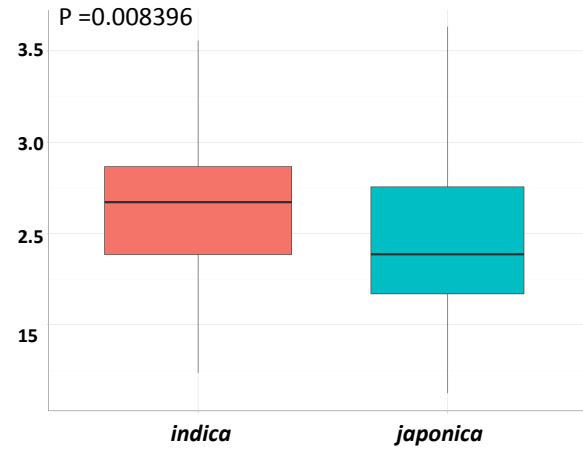

2015

PBN

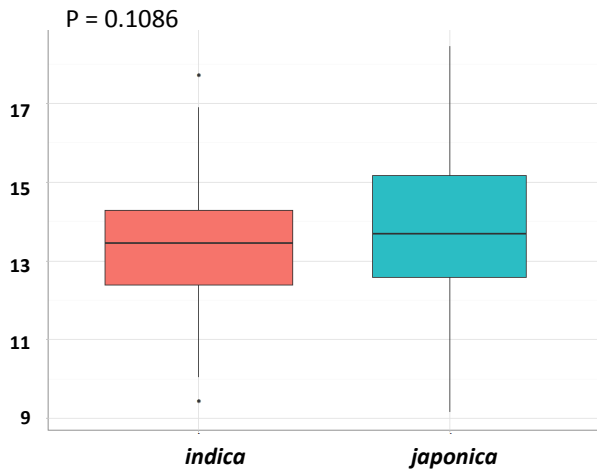

SBN

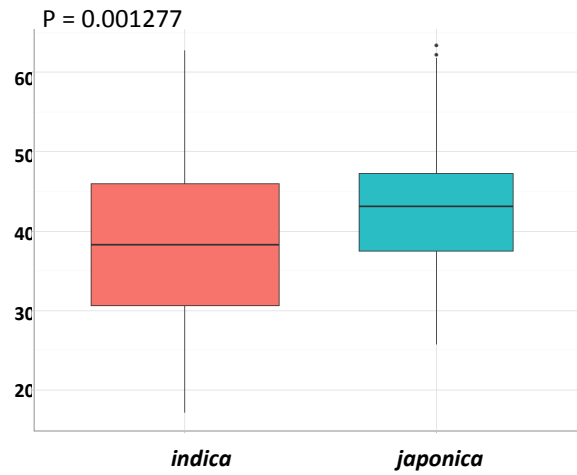

SpN

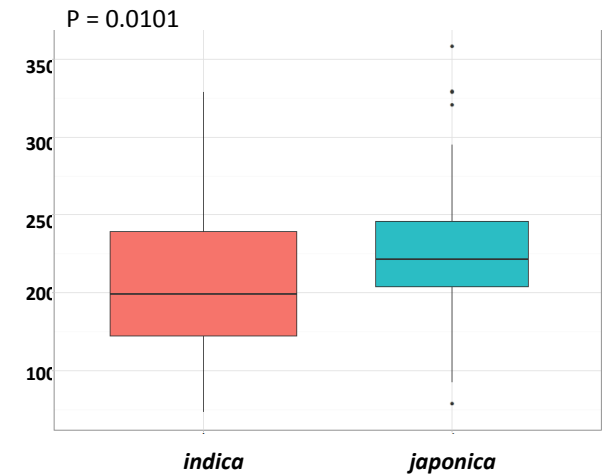

PBintL

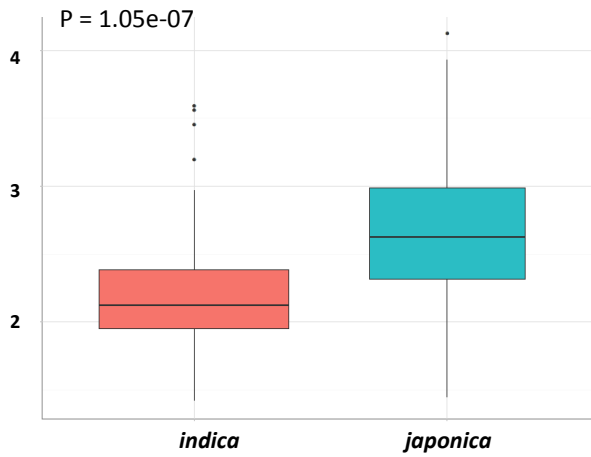

SBintL

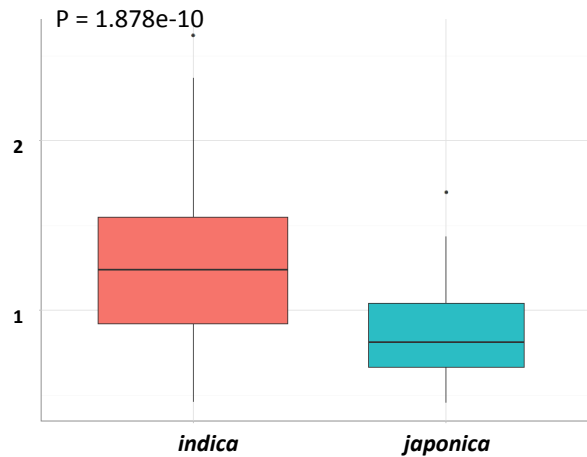

RL

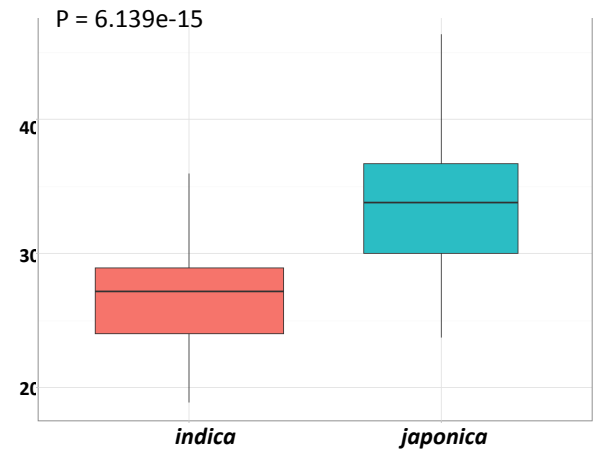

PBL

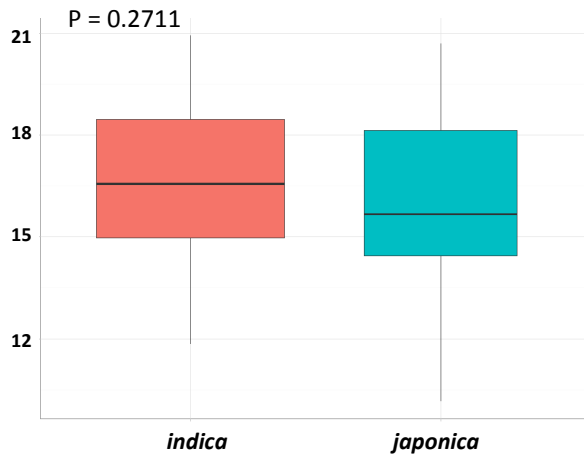

SBL

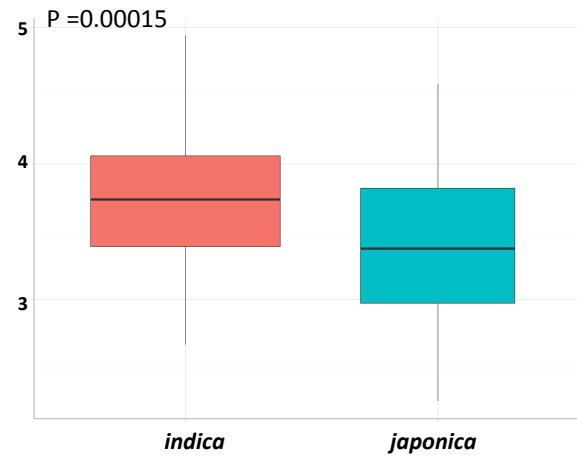

Supplement: 12870_2018_1504_MOESM2_ESM.pdf [file 12870_2018_1504_MOESM2_ESM.pdf]
