# Supplementary material for: A genome-wide association study using a Vietnamese landrace panel of rice (Oryza sativa) reveals new QTLs controlling panicle morphological traits
Source: PubMed Central journal article supplement (PMC6234598; doi:10.1186/s12870-018-1504-1), 2018-11-14

Full panel (2014)

Full panel (2015)

A

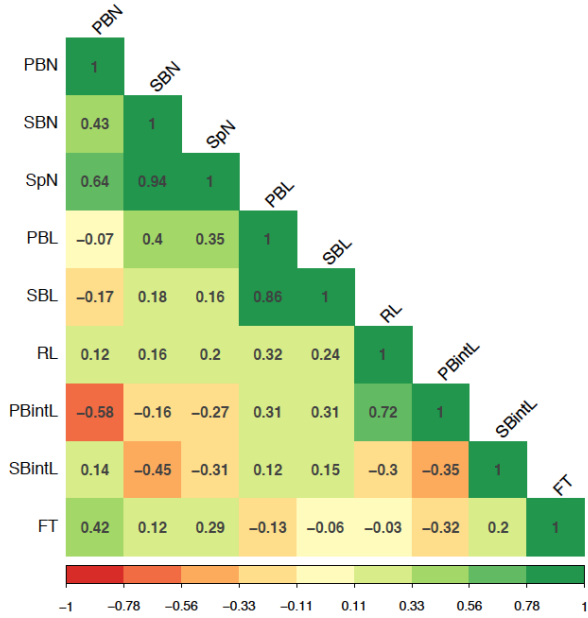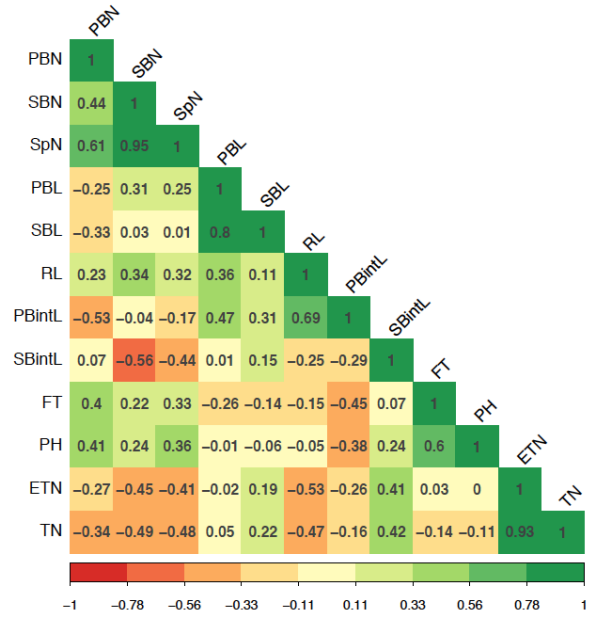

B

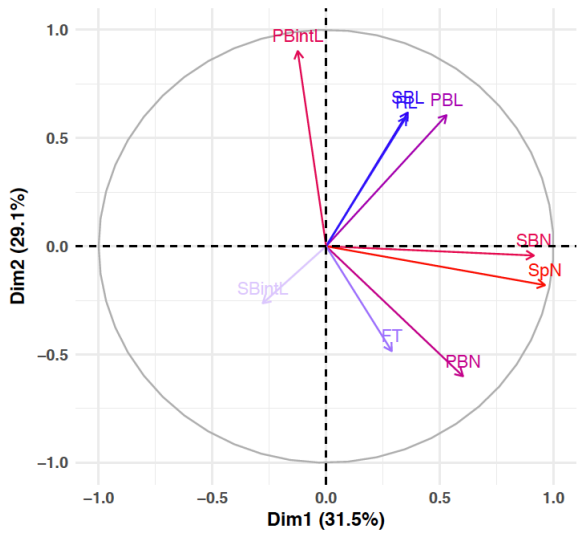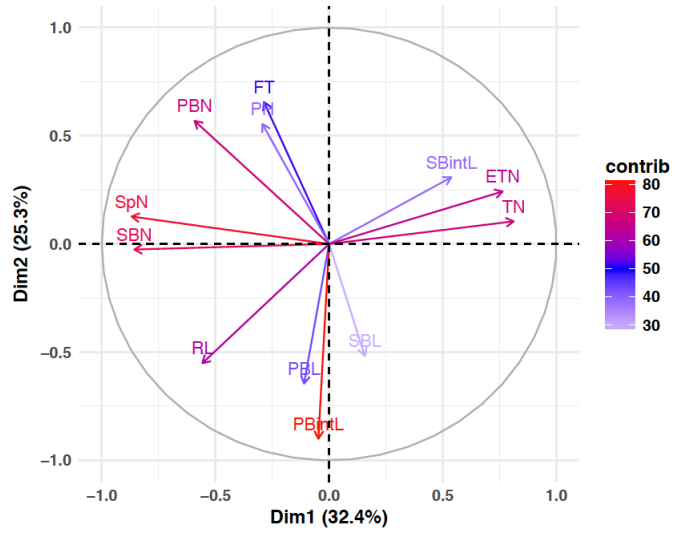

C

*indica* panel (2014)

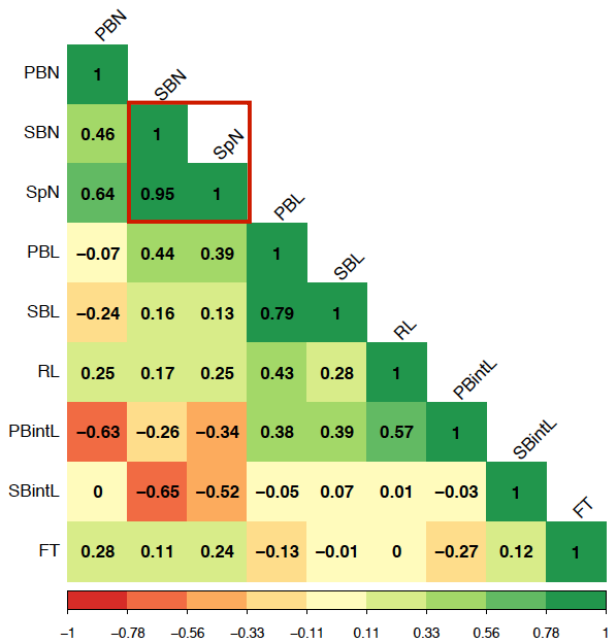

*japonica* panel (2014)

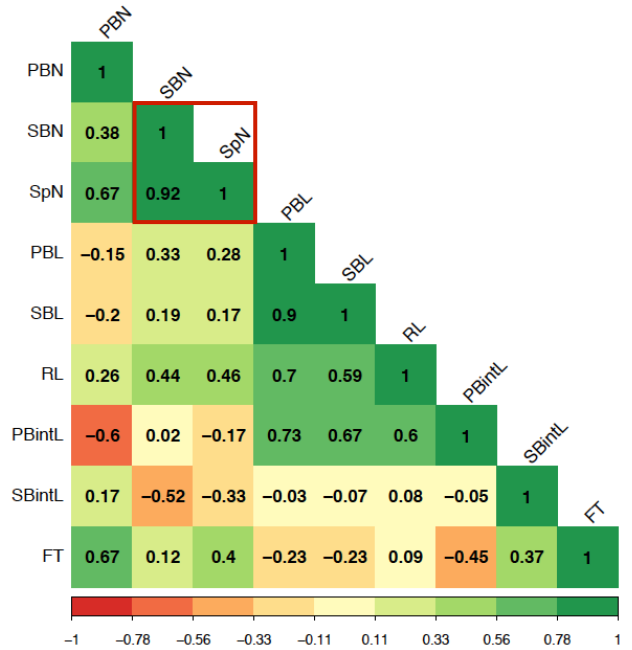

*indica* panel (2015)

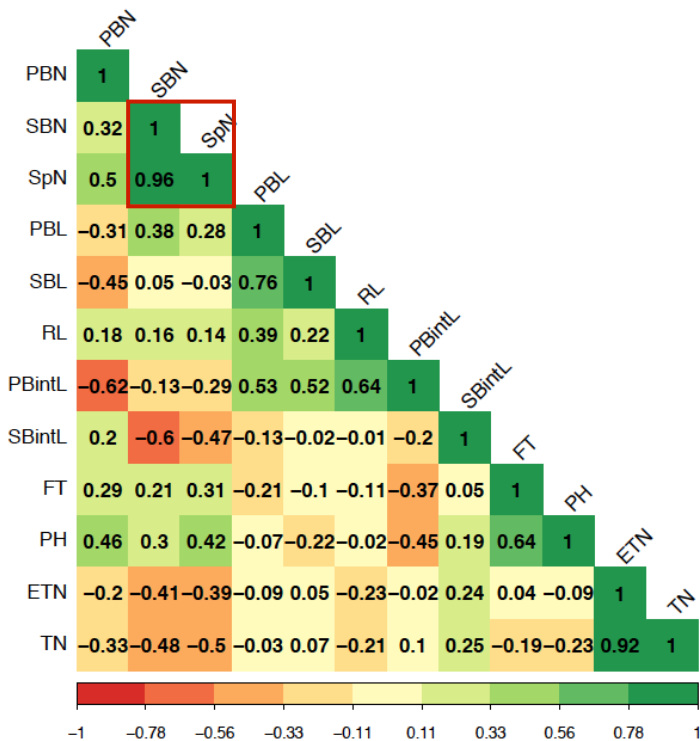

*japonica* panel (2015)

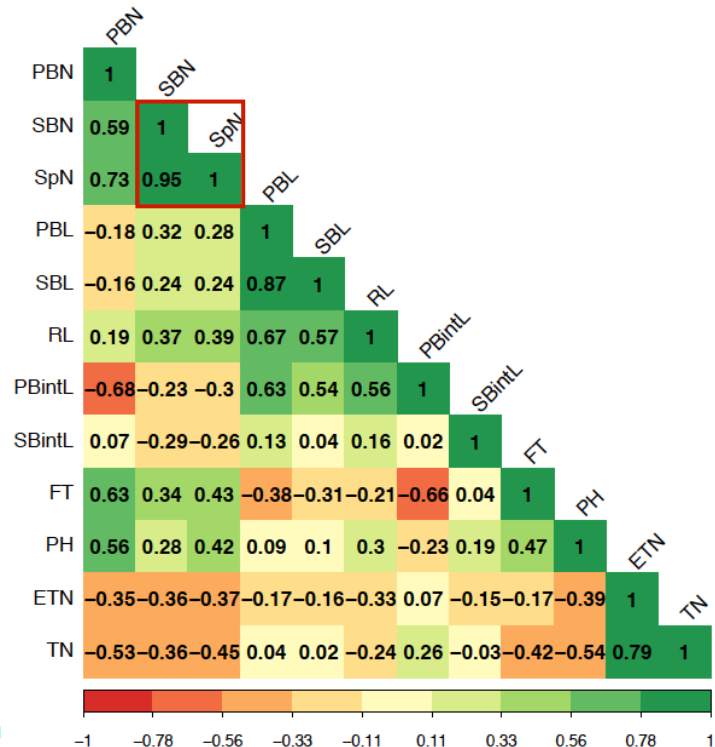

Supplement: 12870_2018_1504_MOESM3_ESM.pdf [file 12870_2018_1504_MOESM3_ESM.pdf]
