# Supplementary material for: A genome-wide association study using a Vietnamese landrace panel of rice (Oryza sativa) reveals new QTLs controlling panicle morphological traits
Source: PubMed Central journal article supplement (PMC6234598; doi:10.1186/s12870-018-1504-1), 2018-11-14

# Heatmap Accessions vs Phenotype traits (2014)

Group

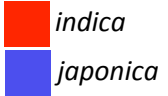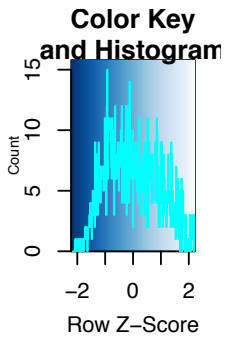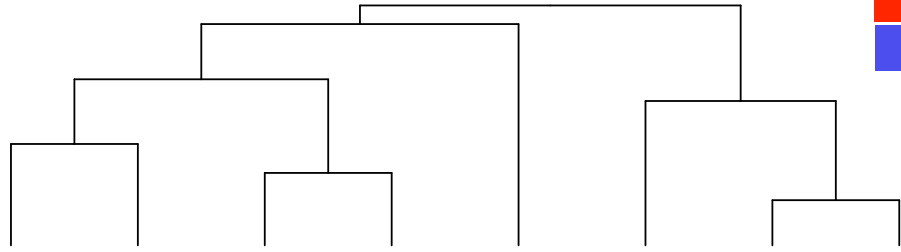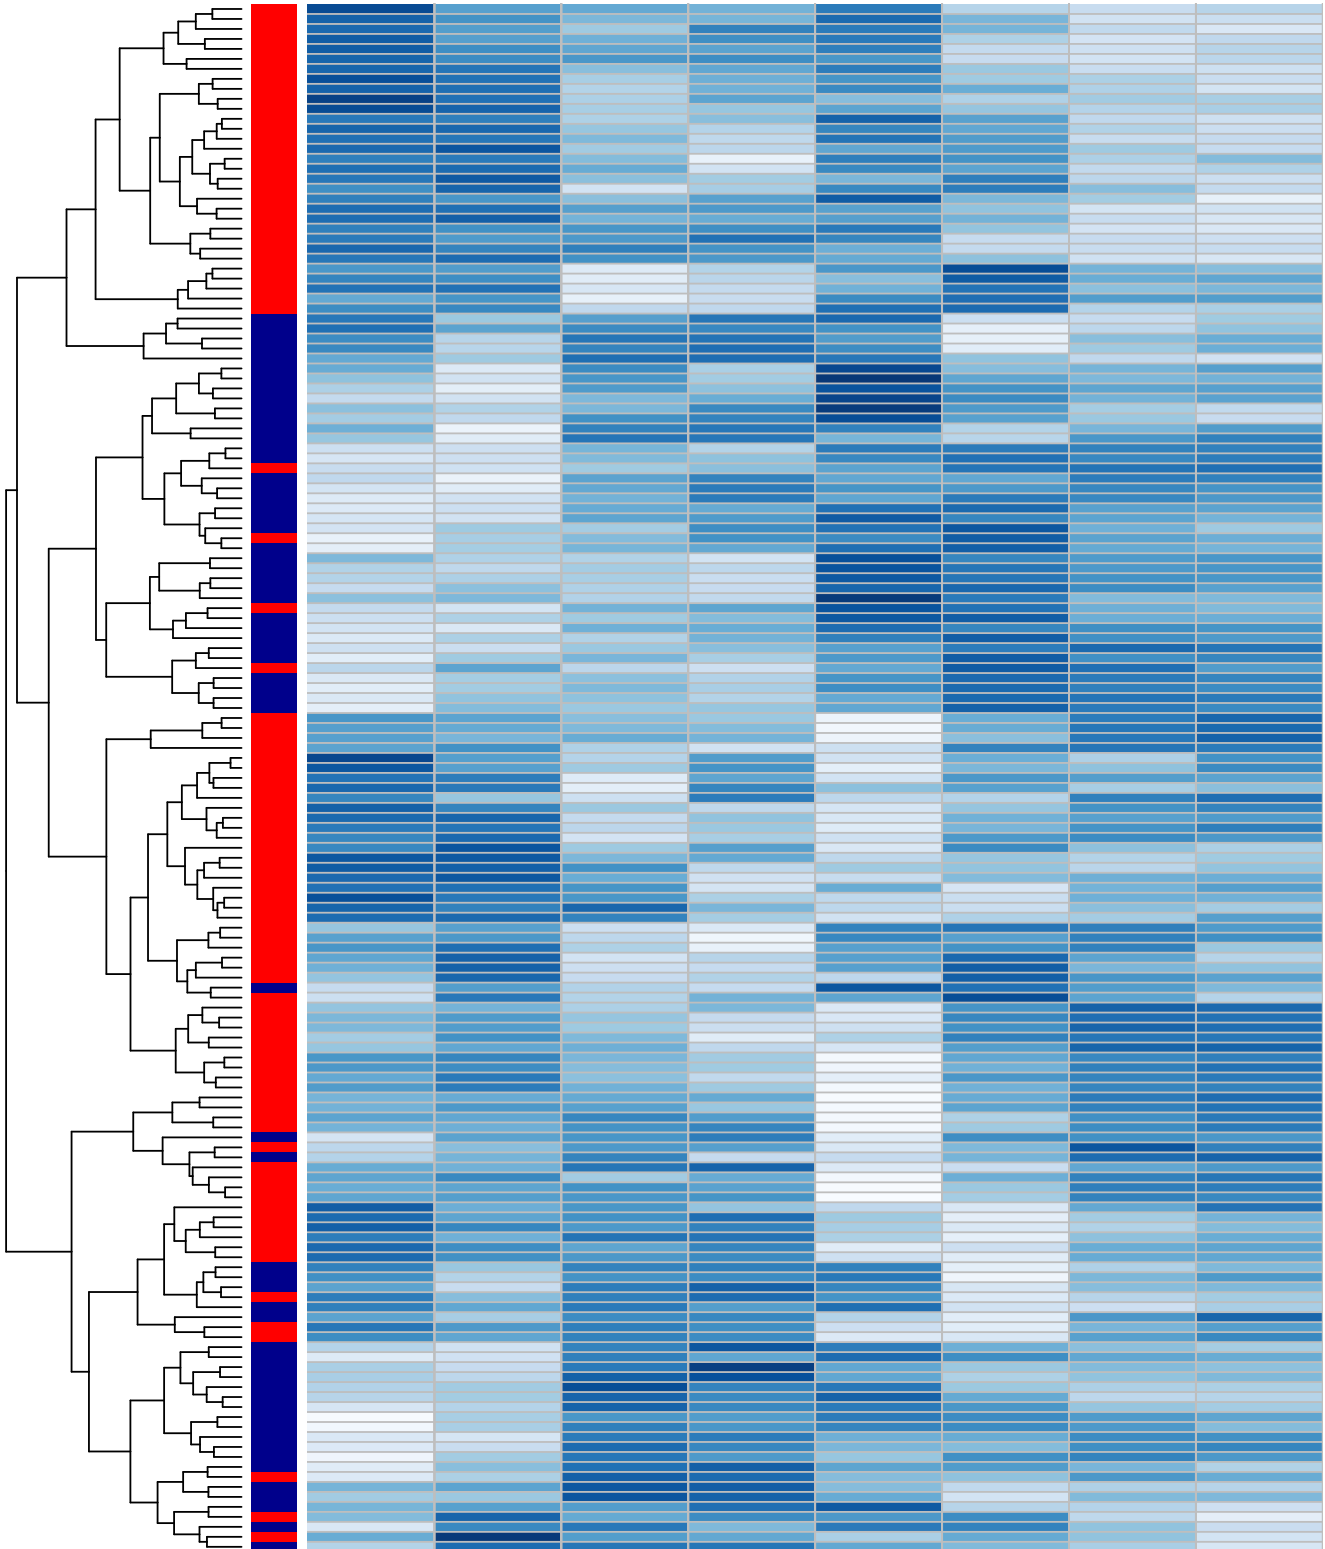

PBintL RL PBL SBL SBintL PBN SpN SBN

**Panicle Traits**

Accessions

# Heatmap Accessions vs Phenotype traits (2015)

**Group**  
■ *indica*  
■ *japonica*

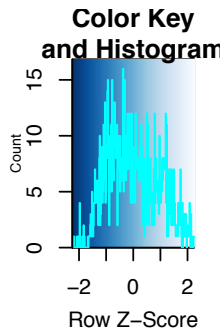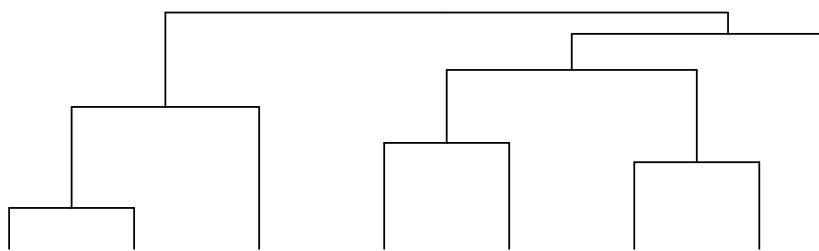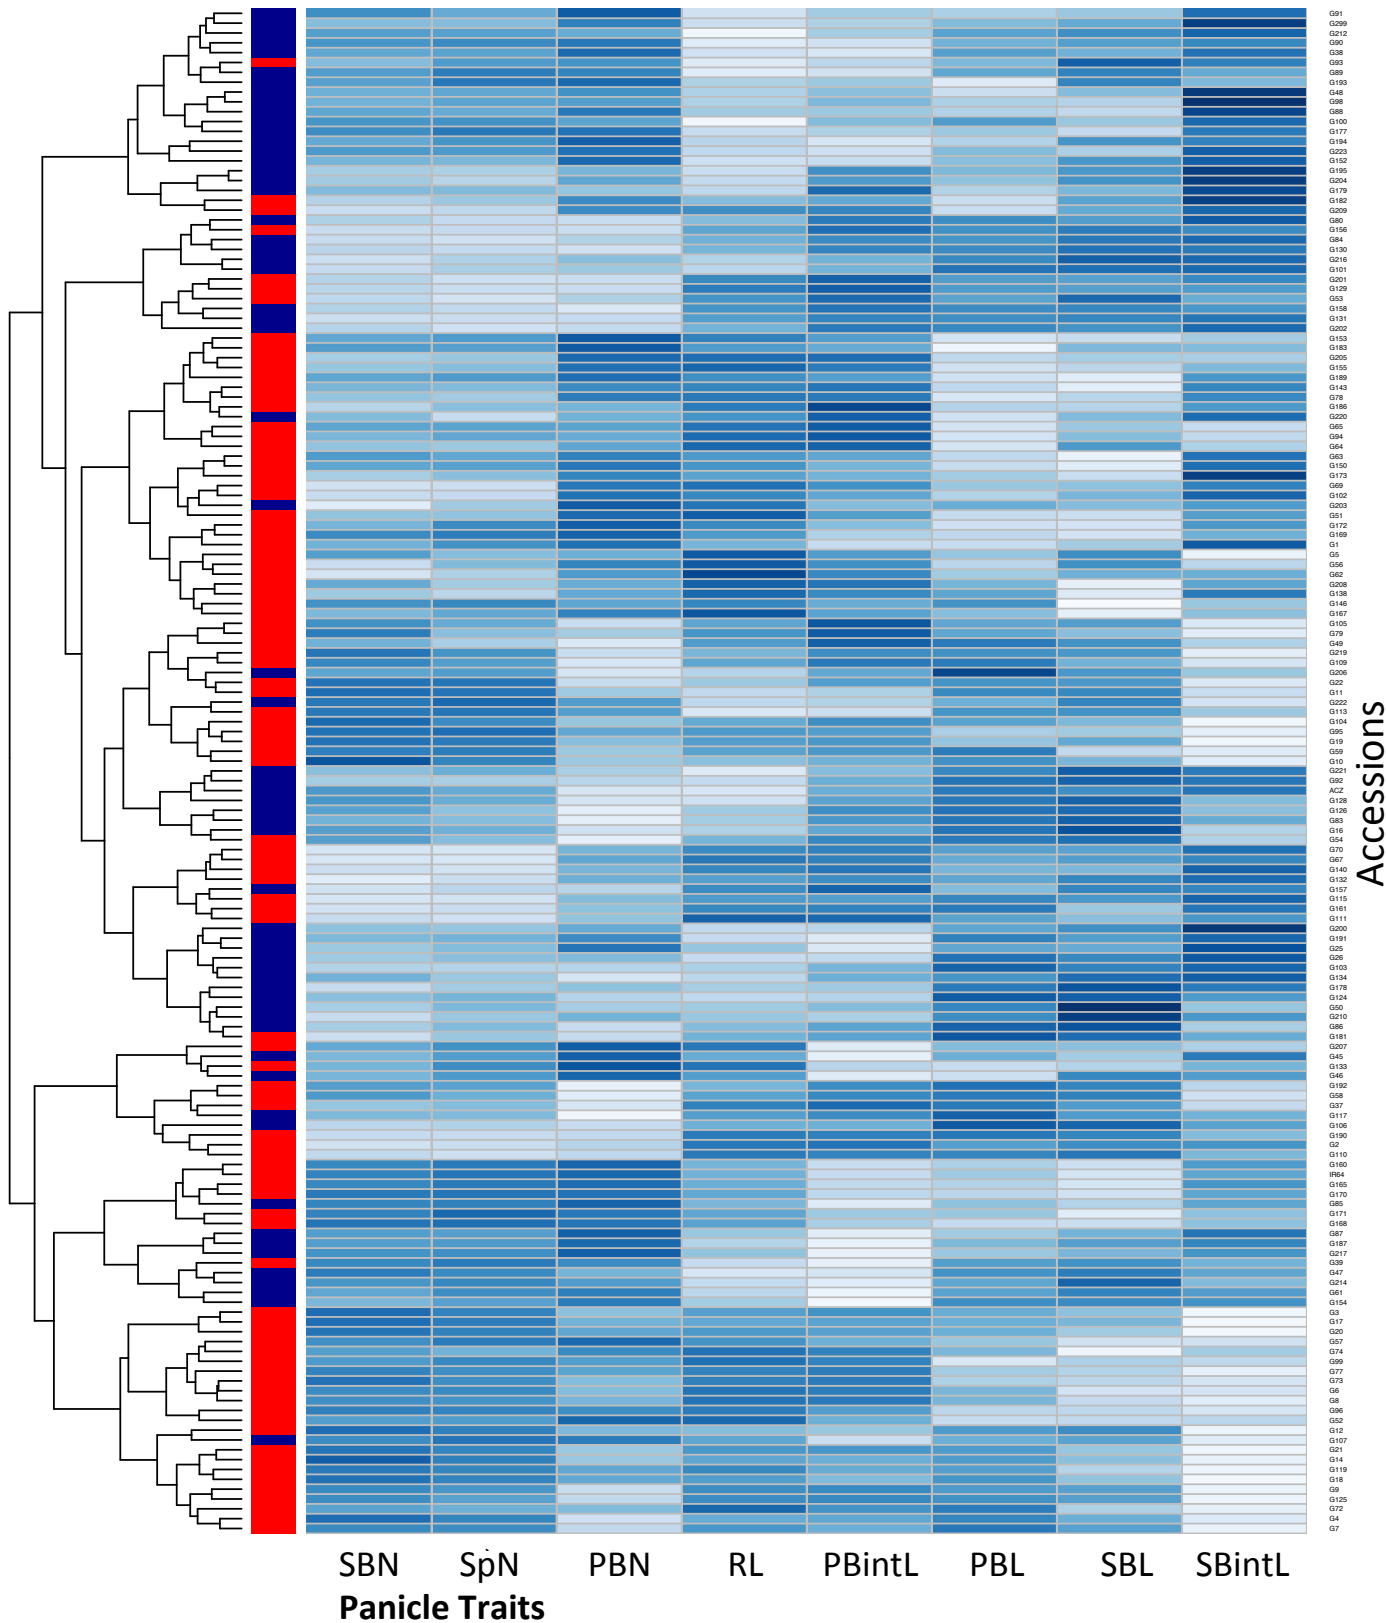

Supplement: 12870_2018_1504_MOESM5_ESM.pdf [file 12870_2018_1504_MOESM5_ESM.pdf]
