# Supplementary material for: A genome-wide association study using a Vietnamese landrace panel of rice (Oryza sativa) reveals new QTLs controlling panicle morphological traits
Source: PubMed Central journal article supplement (PMC6234598; doi:10.1186/s12870-018-1504-1), 2018-11-14

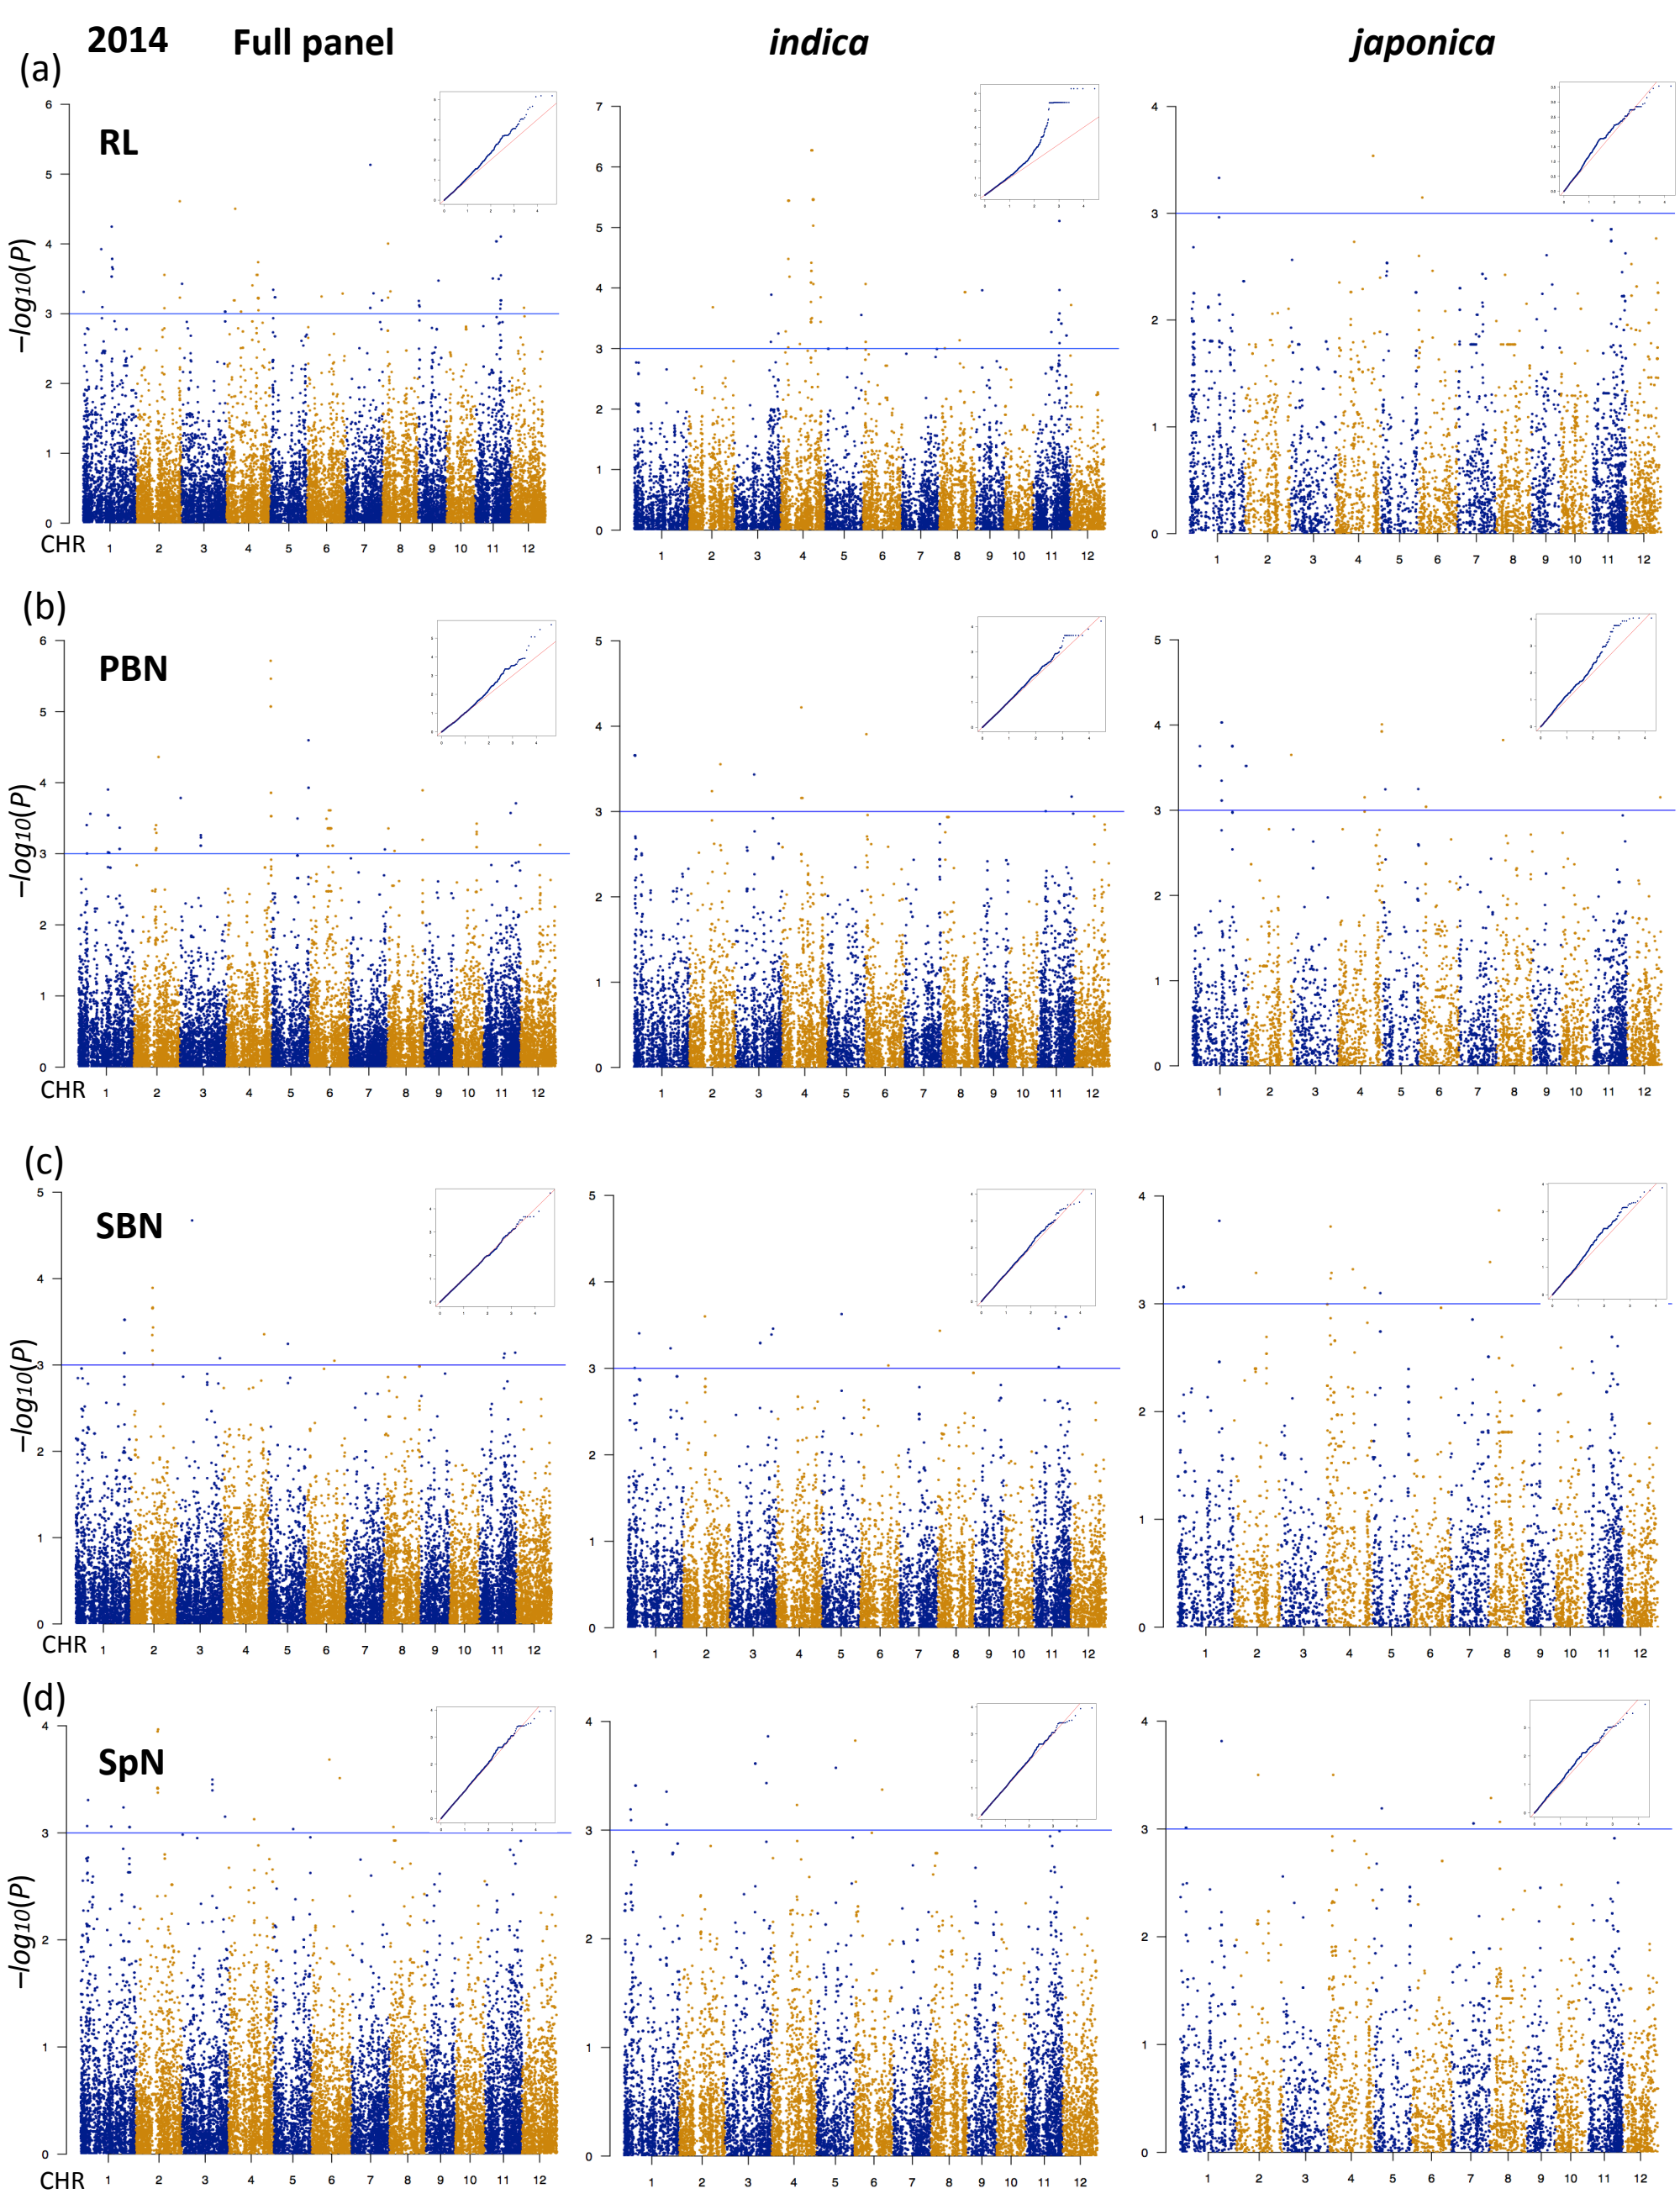

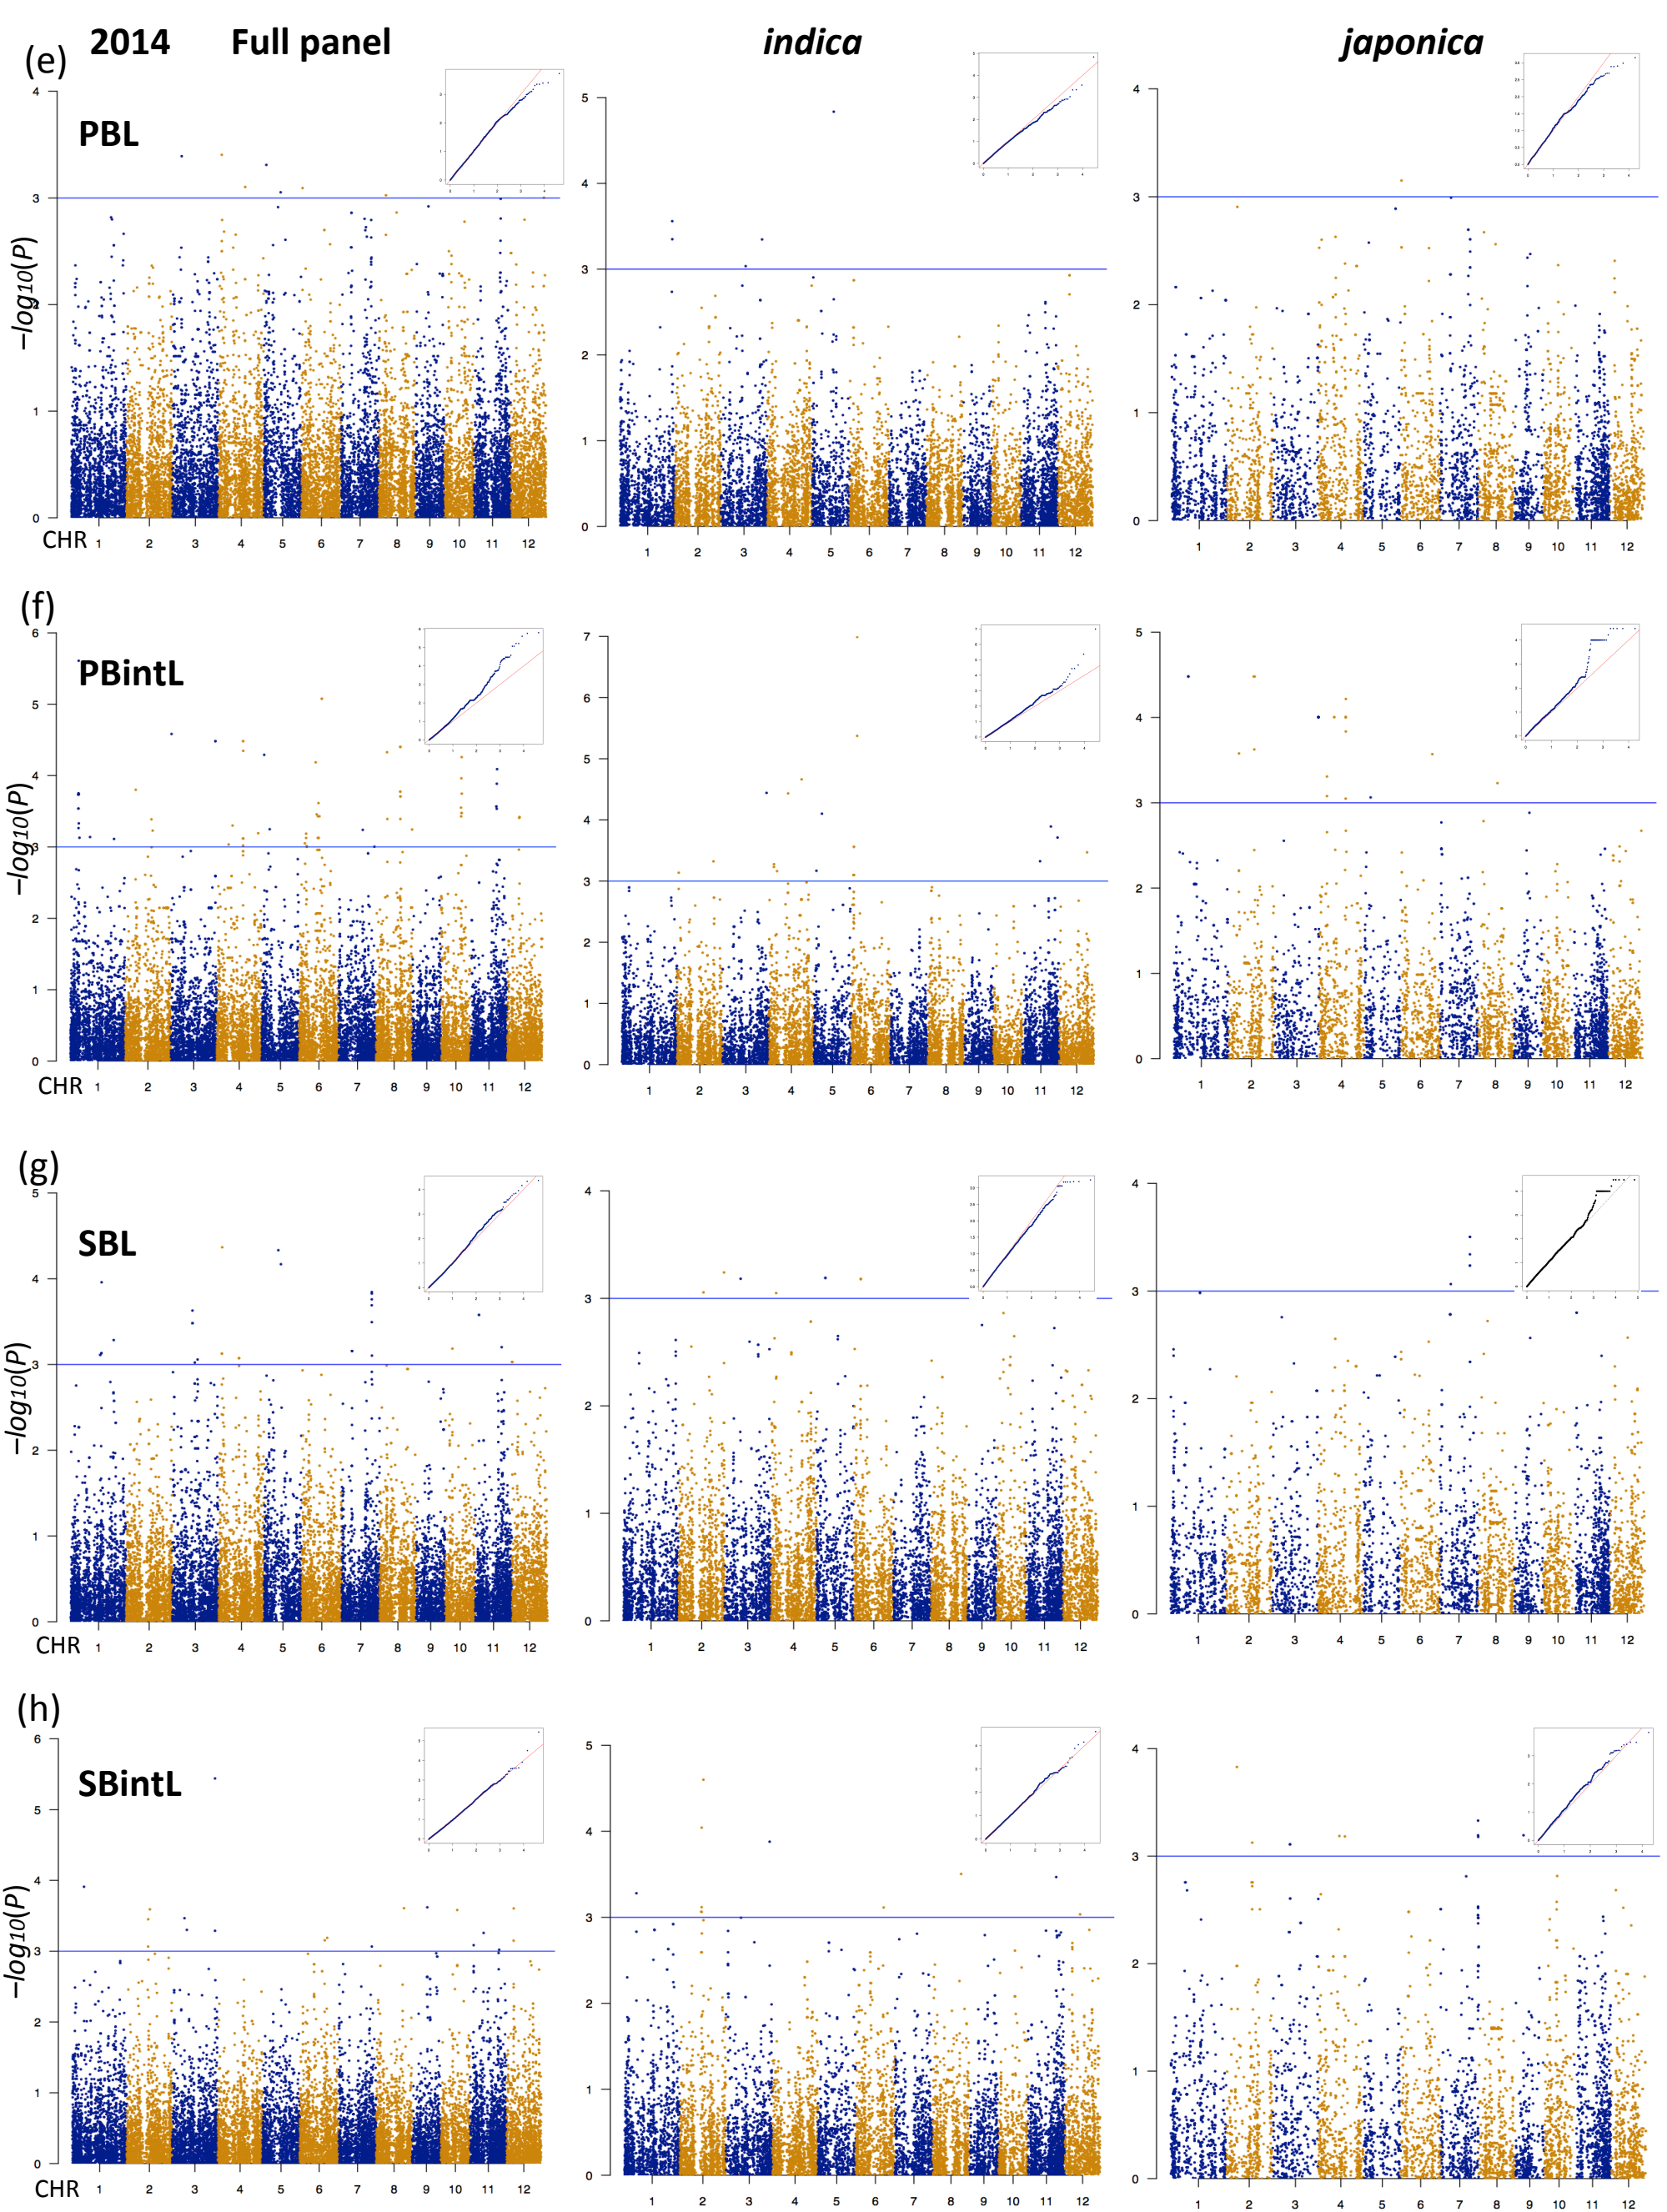

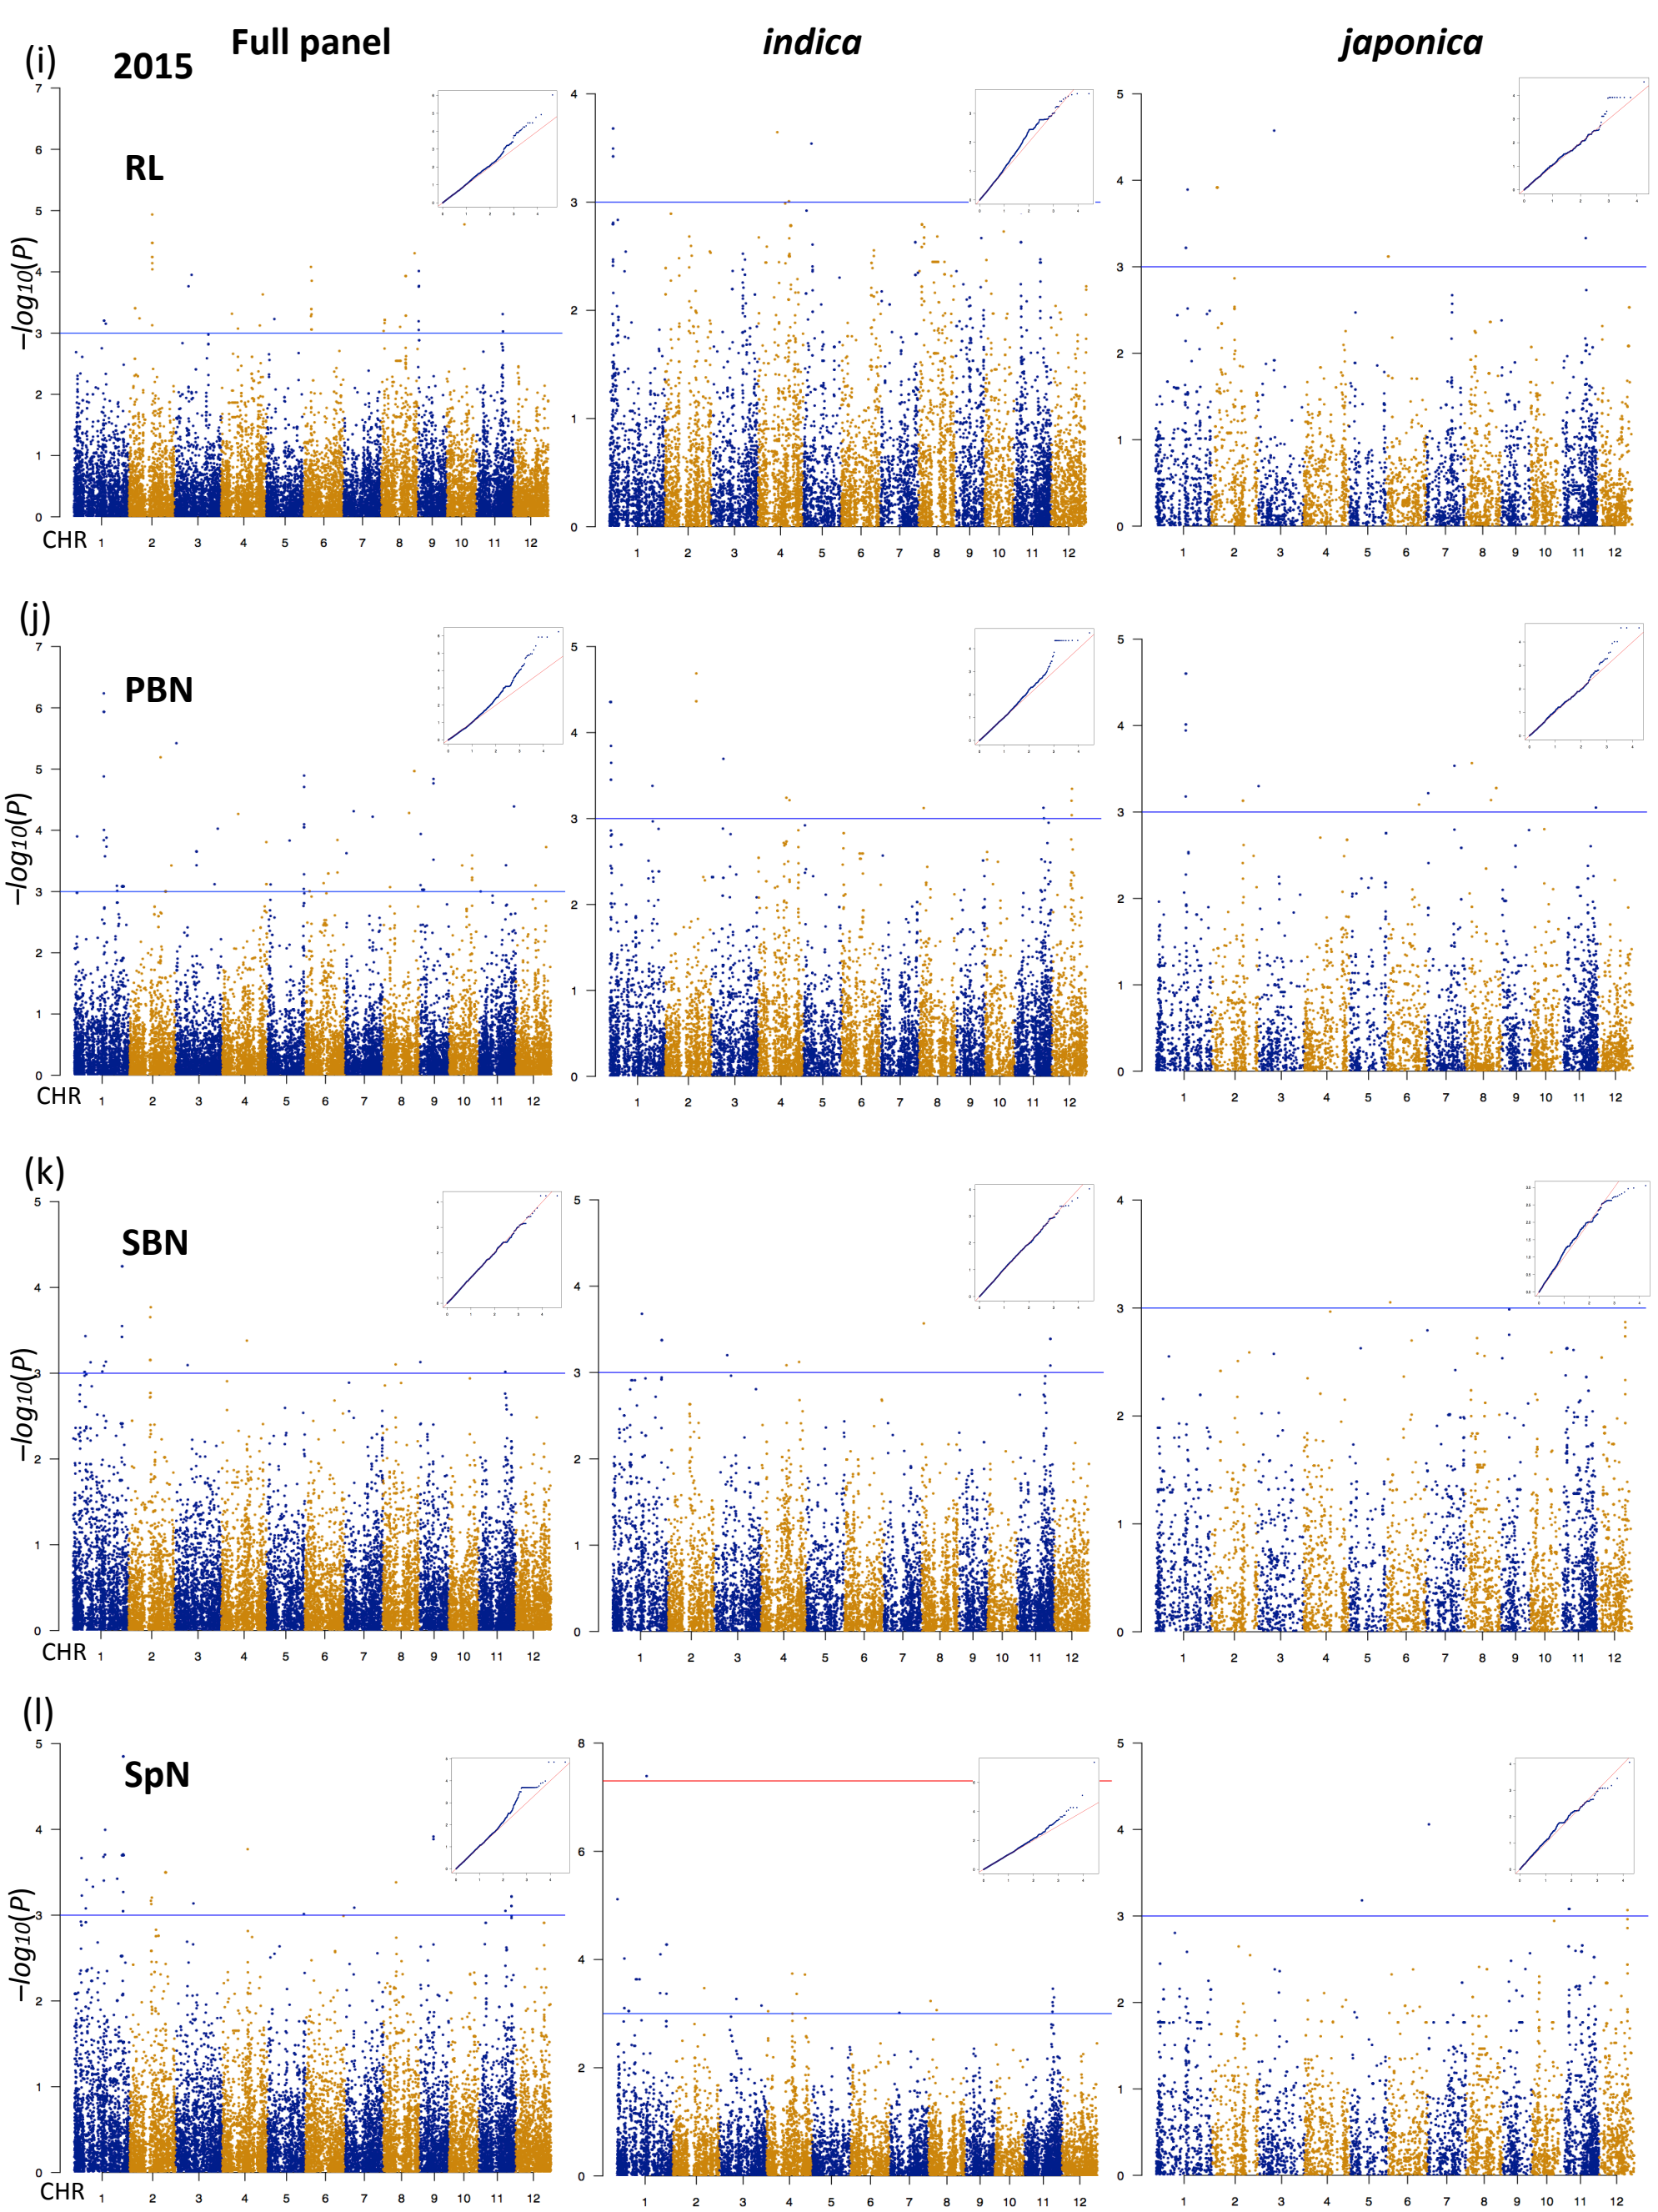

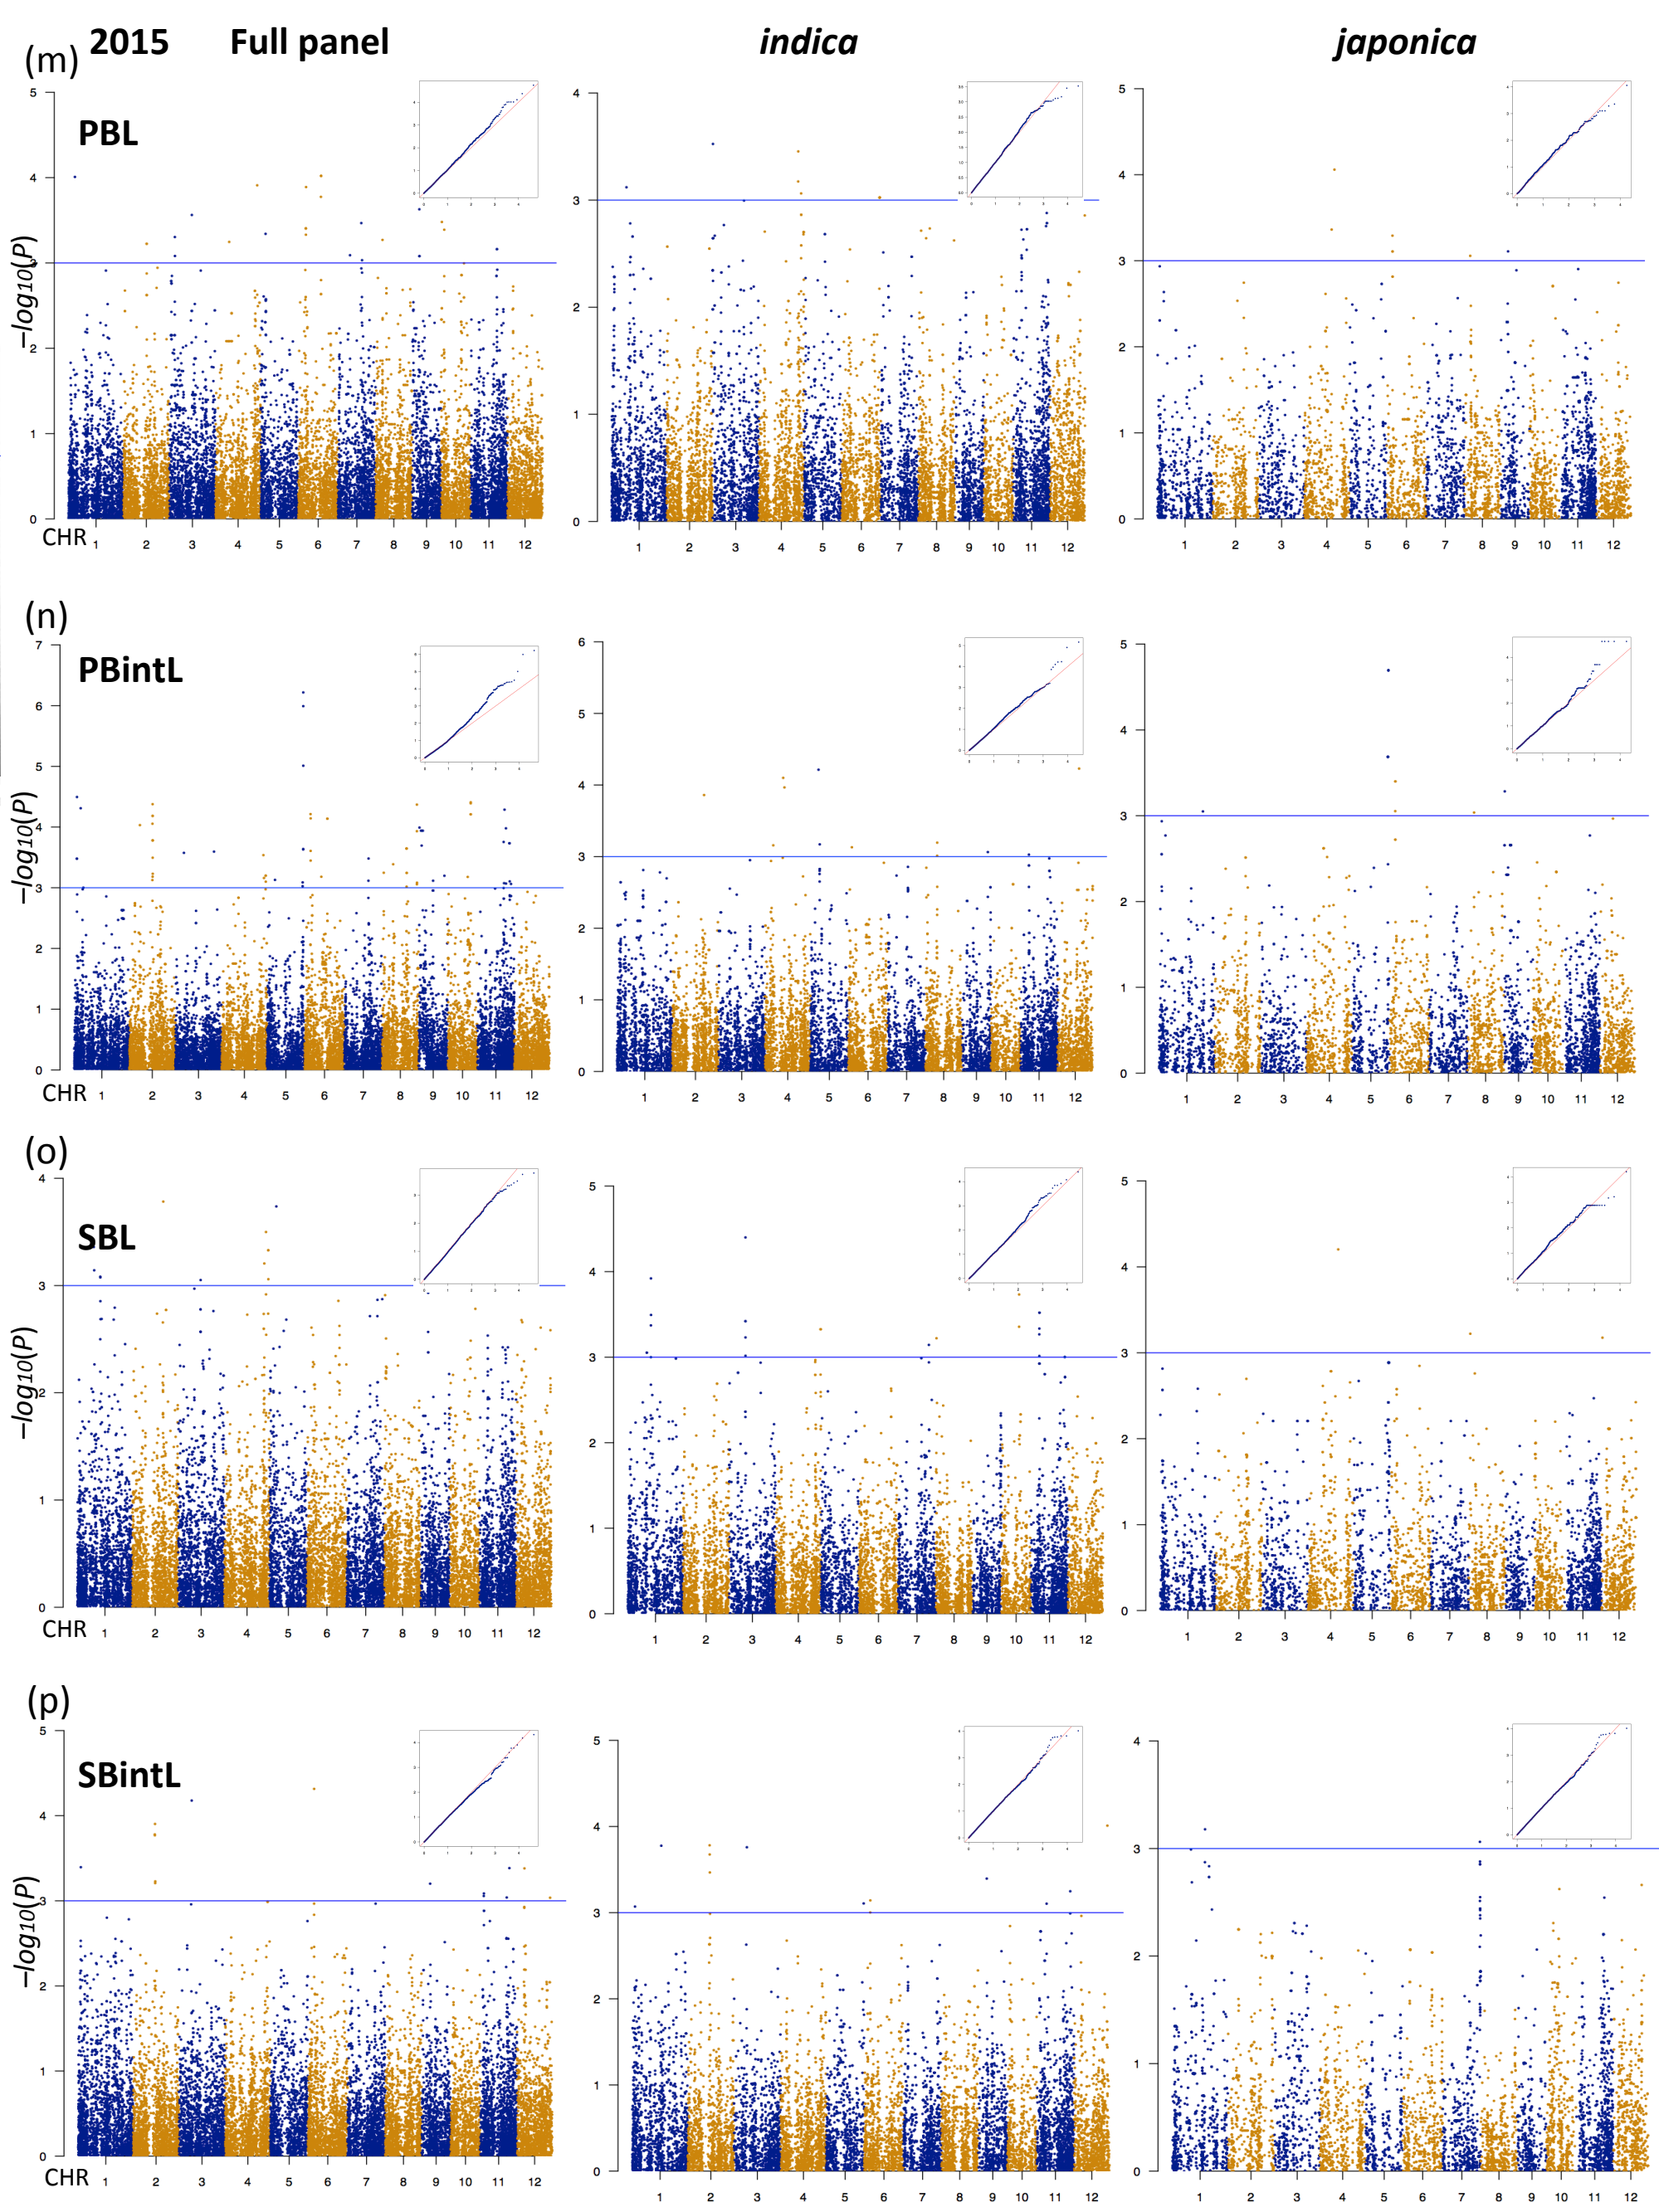

Supplement: 12870_2018_1504_MOESM7_ESM.pdf [file 12870_2018_1504_MOESM7_ESM.pdf]
